# Supplementary material for: MegaLTR: a web server and standalone pipeline for detecting and annotating LTR-retrotransposons in plant genomes
Source: Front Plant Sci. 2023 Sep 20;14:1237426. doi: 10.3389/fpls.2023.1237426 (PMC10552921; doi:10.3389/fpls.2023.1237426)
Supplement: Supplementary file 5 [file DataSheet_5.xlsx]

## Sheet: MegaLTR (All Intact LTR-RT)
Supplementary File 5
LTR-RT id	Pseudomolecules/scaffolds	LTR-RT start	LTR-RT end	LTR-RT length	Class	Superfamily	Clade	Domains
NC_003070.9_13019157_13023945	NC_003070.9	13019157	13023945	4789	LTR	Autonomous:Copia	Ale	GAG|Ale PROT|Ale INT|Ale RT|Ale RH|Ale
NC_003074.8_18791152_18796088	NC_003074.8	18791152	18796088	4937	LTR	Autonomous:Copia	Ale	GAG|Ty1_copia PROT|Ale INT|Ale RT|Ale RH|Ale
NC_003070.9_10610329_10614183	NC_003070.9	10610329	10614183	3855	LTR	Nonautonomous:Copia	Ale	GAG|Ale PROT|Ale INT|Ale RH|Ale
NC_003070.9_11148091_11152835	NC_003070.9	11148091	11152835	4745	LTR	Nonautonomous:Copia	Ale	GAG|Ale PROT|Ale INT|Ale RT|Ale RH|Ale
NC_003070.9_11789452_11794077	NC_003070.9	11789452	11794077	4626	LTR	Nonautonomous:Copia	Ivana	GAG|Ivana PROT|Ivana INT|Ivana RT|Ivana RH|Ivana
NC_003070.9_12406711_12410000	NC_003070.9	12406711	12410000	3290	LTR	Nonautonomous:Copia	Ale	RT|Ale RH|Ale
NC_003070.9_12813589_12816476	NC_003070.9	12813589	12816476	2888	LTR	Nonautonomous:Copia	Bianca	RT|Bianca RH|Bianca
NC_003070.9_13439445_13448523	NC_003070.9	13439445	13448523	9079	LTR	Nonautonomous:Copia	SIRE	GAG|SIRE PROT|SIRE INT|SIRE RT|SIRE RH|SIRE
NC_003070.9_14129671_14134851	NC_003070.9	14129671	14134851	5181	LTR	Nonautonomous:Copia	Tork	GAG|Tork PROT|Tork INT|Tork RT|Tork RH|Tork
NC_003070.9_16117829_16124076	NC_003070.9	16117829	16124076	6248	LTR	Nonautonomous:Copia	SIRE	GAG|SIRE PROT|SIRE INT|SIRE RT|SIRE RH|SIRE
NC_003070.9_16551721_16557069	NC_003070.9	16551721	16557069	5349	LTR	Nonautonomous:Copia	Ale	GAG|Ale PROT|Ale INT|Ale RT|Ale RH|Ale
NC_003070.9_16853318_16858040	NC_003070.9	16853318	16858040	4723	LTR	Nonautonomous:Copia	Ale	GAG|Ale PROT|Ale INT|Ale RT|Ale RH|Ale
NC_003070.9_17023916_17029257	NC_003070.9	17023916	17029257	5342	LTR	Nonautonomous:Copia	Ale	GAG|Ale PROT|Ale INT|Ale RT|Ale RH|Ale
NC_003070.9_17203926_17206318	NC_003070.9	17203926	17206318	2393	LTR	Nonautonomous:Copia	Ivana	GAG|Ivana PROT|Ivana RH|Ivana
NC_003070.9_17443081_17446790	NC_003070.9	17443081	17446790	3710	LTR	Nonautonomous:Copia	Ale	PROT|Ale INT|Ale RT|Ale RH|Ale
NC_003070.9_17520597_17525126	NC_003070.9	17520597	17525126	4530	LTR	Nonautonomous:Copia	Ale	GAG|Ale PROT|Ale INT|Ale RT|Ale RH|Ale
NC_003070.9_17676607_17681382	NC_003070.9	17676607	17681382	4776	LTR	Nonautonomous:Copia	Ale	GAG|Ale PROT|Ale INT|Ale RT|Ale RH|Ale
NC_003070.9_18828527_18833280	NC_003070.9	18828527	18833280	4754	LTR	Nonautonomous:Copia	Ivana	GAG|Ivana PROT|Ivana INT|Ivana RT|Ivana RH|Ivana
NC_003070.9_21244324_21249198	NC_003070.9	21244324	21249198	4875	LTR	Nonautonomous:Copia	Ale	GAG|Ale PROT|Ale INT|Ale RT|Ale RH|Ale
NC_003070.9_21346162_21351041	NC_003070.9	21346162	21351041	4880	LTR	Nonautonomous:Copia	Ale	GAG|Ale PROT|Ale INT|Ale RT|Ale RH|Ale
NC_003070.9_21524995_21529850	NC_003070.9	21524995	21529850	4856	LTR	Nonautonomous:Copia	Ivana	GAG|Ivana PROT|Ivana INT|Ivana RT|Ivana RH|Ivana
NC_003070.9_22100644_22105329	NC_003070.9	22100644	22105329	4686	LTR	Nonautonomous:Copia	Ale	GAG|Ale PROT|Ale INT|Ale RT|Ale RH|Ale
NC_003070.9_26366607_26371668	NC_003070.9	26366607	26371668	5062	LTR	Nonautonomous:Copia	Ale	GAG|Ale PROT|Ale INT|Ale RT|Ale RH|Ale
NC_003070.9_3780765_3785720	NC_003070.9	3780765	3785720	4956	LTR	Nonautonomous:Copia	Ivana	GAG|Ivana PROT|Ivana INT|Ivana RT|Ivana RH|Ivana
NC_003070.9_4406006_4411120	NC_003070.9	4406006	4411120	5115	LTR	Nonautonomous:Copia	Bianca	RH|Bianca
NC_003070.9_7717356_7722547	NC_003070.9	7717356	7722547	5192	LTR	Nonautonomous:Copia	Ivana	GAG|Ivana PROT|Ivana INT|Ivana RT|Ivana RH|Ivana
NC_003070.9_9476002_9480634	NC_003070.9	9476002	9480634	4633	LTR	Nonautonomous:Copia	Ale	GAG|Ale PROT|Ale INT|Ale RT|Ale RH|Ale
NC_003071.7_12539441_12541817	NC_003071.7	12539441	12541817	2377	LTR	Nonautonomous:Copia	Ivana	GAG|Ivana PROT|Ivana RH|Ivana
NC_003071.7_1388832_1393901	NC_003071.7	1388832	1393901	5070	LTR	Nonautonomous:Copia	Bianca	GAG|Bianca PROT|Bianca INT|Bianca RT|Bianca RH|Bianca
NC_003071.7_1395260_1399516	NC_003071.7	1395260	1399516	4257	LTR	Nonautonomous:Copia	Bianca	RH|Bianca
NC_003071.7_1906864_1912112	NC_003071.7	1906864	1912112	5249	LTR	Nonautonomous:Copia	Tork	GAG|Tork PROT|Tork INT|Tork RT|Tork RH|Tork
NC_003071.7_2902330_2907117	NC_003071.7	2902330	2907117	4788	LTR	Nonautonomous:Copia	Ale	GAG|Ale PROT|Ale INT|Ale RT|Ale RH|Ale
NC_003071.7_3687124_3692178	NC_003071.7	3687124	3692178	5055	LTR	Nonautonomous:Copia	Tork	GAG|Tork PROT|Tork INT|Tork RT|Tork RH|Tork
NC_003071.7_4061046_4065458	NC_003071.7	4061046	4065458	4413	LTR	Nonautonomous:Copia	Tork	GAG|Tork INT|Tork RT|Tork RH|Tork
NC_003071.7_4230743_4236512	NC_003071.7	4230743	4236512	5770	LTR	Nonautonomous:Copia	Tork	GAG|Tork PROT|Tork INT|Tork RT|Tork RH|Tork
NC_003071.7_5062484_5067403	NC_003071.7	5062484	5067403	4920	LTR	Nonautonomous:Copia	Ale	GAG|Ale PROT|Ale INT|Ale RT|Ale RH|Ale
NC_003071.7_5073847_5078418	NC_003071.7	5073847	5078418	4572	LTR	Nonautonomous:Copia	Tork	GAG|Tork PROT|Tork INT|Tork RH|Tork
NC_003071.7_5394710_5399649	NC_003071.7	5394710	5399649	4940	LTR	Nonautonomous:Copia	Bianca	PROT|Bianca INT|Bianca RT|Bianca RH|Bianca
NC_003071.7_5852422_5857428	NC_003071.7	5852422	5857428	5007	LTR	Nonautonomous:Copia	Ale	GAG|Ale PROT|Ale INT|Ale RT|Ale RH|Ale
NC_003071.7_6422230_6427295	NC_003071.7	6422230	6427295	5066	LTR	Nonautonomous:Copia	Ale	GAG|Ty1_copia PROT|Ale INT|Ale RT|Ale RH|Ale
NC_003071.7_6819006_6823730	NC_003071.7	6819006	6823730	4725	LTR	Nonautonomous:Copia	Ivana	GAG|Ivana PROT|Ivana INT|Ivana RT|Ivana RH|Ivana
NC_003071.7_7448762_7454289	NC_003071.7	7448762	7454289	5528	LTR	Nonautonomous:Copia	Ale	GAG|Ale PROT|Ale INT|Ale RT|Ale RH|Ale
NC_003071.7_7598600_7602611	NC_003071.7	7598600	7602611	4012	LTR	Nonautonomous:Copia	Ivana	PROT|Ivana INT|Ivana RT|Ivana RH|Ivana
NC_003071.7_909733_914338	NC_003071.7	909733	914338	4606	LTR	Nonautonomous:Copia	Bianca	RH|Bianca
NC_003071.7_9121958_9125818	NC_003071.7	9121958	9125818	3861	LTR	Nonautonomous:Copia	Tork	GAG|Tork PROT|Tork INT|Tork RT|Tork RH|Tork
NC_003071.7_9187492_9195279	NC_003071.7	9187492	9195279	7788	LTR	Nonautonomous:Copia	Tork	GAG|Tork PROT|Tork INT|Tork RT|Tork RH|Tork
NC_003071.7_926131_929956	NC_003071.7	926131	929956	3826	LTR	Nonautonomous:Copia	Tork	GAG|Tork PROT|Tork INT|Tork RT|Tork
NC_003074.8_10577158_10581824	NC_003074.8	10577158	10581824	4667	LTR	Nonautonomous:Copia	Ivana	GAG|Ivana PROT|Ivana INT|Ivana RT|Ivana RH|Ivana
NC_003074.8_11016111_11020804	NC_003074.8	11016111	11020804	4694	LTR	Nonautonomous:Copia	Ale	GAG|Ale PROT|Ale INT|Ale RT|Ale RH|Ale
NC_003074.8_11122707_11127674	NC_003074.8	11122707	11127674	4968	LTR	Nonautonomous:Copia	Ale	GAG|Ale PROT|Ale INT|Ale RT|Ale RH|Ale
NC_003074.8_11335553_11341895	NC_003074.8	11335553	11341895	6343	LTR	Nonautonomous:Copia	Bianca	GAG|Bianca PROT|Bianca INT|Bianca RT|Bianca RH|Bianca
NC_003074.8_11652697_11657743	NC_003074.8	11652697	11657743	5047	LTR	Nonautonomous:Copia	Ale	GAG|Ale PROT|Ale INT|Ale RT|Ale RH|Ale
NC_003074.8_11664969_11669787	NC_003074.8	11664969	11669787	4819	LTR	Nonautonomous:Copia	Ivana	GAG|Ivana PROT|Ivana INT|Ivana RT|Ivana RH|Ivana
NC_003074.8_11697283_11702262	NC_003074.8	11697283	11702262	4980	LTR	Nonautonomous:Copia	Ale	GAG|Ale PROT|Ale INT|Ale RT|Ale RH|Ale
NC_003074.8_13360109_13368309	NC_003074.8	13360109	13368309	8201	LTR	Nonautonomous:Copia	SIRE	GAG|SIRE PROT|SIRE INT|SIRE RT|SIRE RH|SIRE
NC_003074.8_13369174_13374107	NC_003074.8	13369174	13374107	4934	LTR	Nonautonomous:Copia	Ivana	GAG|Ivana PROT|Ivana INT|Ivana RT|Ivana RH|Ivana
NC_003074.8_13561769_13568405	NC_003074.8	13561769	13568405	6637	LTR	Nonautonomous:Copia	Angela	PROT|Angela INT|Angela RT|Angela RH|Angela
NC_003074.8_14616108_14623209	NC_003074.8	14616108	14623209	7102	LTR	Nonautonomous:Copia	mixture	GAG|Ivana RH|SIRE
NC_003074.8_14671141_14675856	NC_003074.8	14671141	14675856	4716	LTR	Nonautonomous:Copia	Ivana	GAG|Ivana PROT|Ivana INT|Ivana RT|Ivana RH|Ivana
NC_003074.8_15377102_15382206	NC_003074.8	15377102	15382206	5105	LTR	Nonautonomous:Copia	Tork	GAG|Tork PROT|Tork INT|Tork RT|Tork RH|Tork
NC_003074.8_15540532_15549243	NC_003074.8	15540532	15549243	8712	LTR	Nonautonomous:Copia	SIRE	GAG|SIRE PROT|SIRE INT|SIRE RT|SIRE RH|SIRE
NC_003074.8_15591669_15600821	NC_003074.8	15591669	15600821	9153	LTR	Nonautonomous:Copia	SIRE	GAG|SIRE PROT|SIRE INT|SIRE RT|SIRE RH|SIRE
NC_003074.8_15621873_15626854	NC_003074.8	15621873	15626854	4982	LTR	Nonautonomous:Copia	Ale	GAG|Ale PROT|Ale INT|Ale RT|Ale RH|Ale
NC_003074.8_15768787_15773747	NC_003074.8	15768787	15773747	4961	LTR	Nonautonomous:Copia	Ale	GAG|Ale PROT|Ale INT|Ale RT|Ale RH|Ale
NC_003074.8_15814611_15818285	NC_003074.8	15814611	15818285	3675	LTR	Nonautonomous:Copia	Bianca	RH|Bianca
NC_003074.8_16691859_16697596	NC_003074.8	16691859	16697596	5738	LTR	Nonautonomous:Copia	Tork	GAG|Tork PROT|Tork INT|Tork RT|Tork RH|Tork
NC_003074.8_16809187_16814152	NC_003074.8	16809187	16814152	4966	LTR	Nonautonomous:Copia	Ale	GAG|Ale PROT|Ale INT|Ale RT|Ale RH|Ale
NC_003074.8_16957465_16962731	NC_003074.8	16957465	16962731	5267	LTR	Nonautonomous:Copia	Ale	GAG|Ale PROT|Ale INT|Ale RT|Ale RH|Ale
NC_003074.8_18734248_18739392	NC_003074.8	18734248	18739392	5145	LTR	Nonautonomous:Copia	Bianca	RH|Bianca
NC_003074.8_22059535_22064329	NC_003074.8	22059535	22064329	4795	LTR	Nonautonomous:Copia	Ivana	GAG|Ivana PROT|Ivana INT|Ivana RT|Ivana RH|Ivana
NC_003074.8_22232175_22236802	NC_003074.8	22232175	22236802	4628	LTR	Nonautonomous:Copia	Ivana	GAG|Ivana PROT|Ivana INT|Ivana RT|Ivana RH|Ivana
NC_003074.8_22695566_22700521	NC_003074.8	22695566	22700521	4956	LTR	Nonautonomous:Copia	Ivana	GAG|Ivana PROT|Ivana INT|Ivana RT|Ivana RH|Ivana
NC_003074.8_23100313_23104852	NC_003074.8	23100313	23104852	4540	LTR	Nonautonomous:Copia	Ivana	GAG|Ivana PROT|Ivana INT|Ivana RT|Ivana RH|Ivana
NC_003074.8_9226633_9231377	NC_003074.8	9226633	9231377	4745	LTR	Nonautonomous:Copia	Ivana	GAG|Ivana PROT|Ivana INT|Ivana RT|Ivana RH|Ivana
NC_003075.7_10899527_10904692	NC_003075.7	10899527	10904692	5166	LTR	Nonautonomous:Copia	Bianca	RH|Bianca
NC_003075.7_10992996_10998058	NC_003075.7	10992996	10998058	5063	LTR	Nonautonomous:Copia	Ale	GAG|Ale PROT|Ale INT|Ale RT|Ale RH|Ale
NC_003075.7_11363556_11368653	NC_003075.7	11363556	11368653	5098	LTR	Nonautonomous:Copia	Tork	GAG|Tork PROT|Tork INT|Tork RT|Tork RH|Tork
NC_003075.7_11676468_11681340	NC_003075.7	11676468	11681340	4873	LTR	Nonautonomous:Copia	Ale	GAG|Ale PROT|Ale INT|Ale RT|Ale RH|Ale
NC_003075.7_1312401_1317218	NC_003075.7	1312401	1317218	4818	LTR	Nonautonomous:Copia	Ale	GAG|Ale PROT|Ale INT|Ale RT|Ale RH|Ale
NC_003075.7_13624548_13627187	NC_003075.7	13624548	13627187	2640	LTR	Nonautonomous:Copia	Ale	RT|Ale RH|Ale
NC_003075.7_13624548_13631872	NC_003075.7	13624548	13631872	7325	LTR	Nonautonomous:Copia	Ale	RT|Ale GAG|Ale PROT|Ale INT|Ale RH|Ale
NC_003075.7_14258825_14263830	NC_003075.7	14258825	14263830	5006	LTR	Nonautonomous:Copia	Ale	GAG|Ale PROT|Ale INT|Ale RT|Ale RH|Ale
NC_003075.7_1565685_1567403	NC_003075.7	1565685	1567403	1719	LTR	Nonautonomous:Copia	Ale	GAG|Ale
NC_003075.7_1749270_1755807	NC_003075.7	1749270	1755807	6538	LTR	Nonautonomous:Copia	Angela	PROT|Angela INT|Angela RT|Angela RH|Angela
NC_003075.7_2188979_2194314	NC_003075.7	2188979	2194314	5336	LTR	Nonautonomous:Copia	Ale	GAG|Ale PROT|Ale INT|Ale RT|Ale RH|Ale
NC_003075.7_2198165_2203993	NC_003075.7	2198165	2203993	5829	LTR	Nonautonomous:Copia	SIRE	GAG|SIRE PROT|SIRE INT|SIRE RT|SIRE RH|SIRE
NC_003075.7_3907466_3915199	NC_003075.7	3907466	3915199	7734	LTR	Nonautonomous:Copia	SIRE	GAG|SIRE PROT|SIRE RT|SIRE RH|SIRE
NC_003075.7_5303774_5309049	NC_003075.7	5303774	5309049	5276	LTR	Nonautonomous:Copia	Ale	GAG|Ale PROT|Ale INT|Ale RT|Ale RH|Ale
NC_003075.7_5822426_5827300	NC_003075.7	5822426	5827300	4875	LTR	Nonautonomous:Copia	Ale	GAG|Ale PROT|Ale INT|Ale RT|Ale RH|Ale
NC_003075.7_5905482_5916987	NC_003075.7	5905482	5916987	11506	LTR	Nonautonomous:Copia	Ale	GAG|Ty1_copia PROT|Ale INT|Ale RT|Ale RH|Ale
NC_003075.7_6467413_6473067	NC_003075.7	6467413	6473067	5655	LTR	Nonautonomous:Copia	Tork	GAG|Tork PROT|Tork INT|Tork RT|Tork RH|Tork
NC_003075.7_6588726_6593808	NC_003075.7	6588726	6593808	5083	LTR	Nonautonomous:Copia	Ale	GAG|Ty1_copia PROT|Ale INT|Ale RT|Ale RH|Ale
NC_003075.7_6723347_6728790	NC_003075.7	6723347	6728790	5444	LTR	Nonautonomous:Copia	Ale	GAG|Ale PROT|Ale INT|Ale RT|Ale RH|Ale
NC_003075.7_6914662_6919598	NC_003075.7	6914662	6919598	4937	LTR	Nonautonomous:Copia	Ale	GAG|Ale PROT|Ale INT|Ale RT|Ale RH|Ale
NC_003075.7_7359462_7364591	NC_003075.7	7359462	7364591	5130	LTR	Nonautonomous:Copia	Bianca	RH|Bianca
NC_003075.7_7816826_7821792	NC_003075.7	7816826	7821792	4967	LTR	Nonautonomous:Copia	Bianca	RH|Bianca
NC_003075.7_9908996_9914046	NC_003075.7	9908996	9914046	5051	LTR	Nonautonomous:Copia	Bianca	RH|Bianca
NC_003076.8_10400732_10405873	NC_003076.8	10400732	10405873	5142	LTR	Nonautonomous:Copia	Bianca	RH|Bianca
NC_003076.8_10638497_10643362	NC_003076.8	10638497	10643362	4866	LTR	Nonautonomous:Copia	Ale	GAG|Ale PROT|Ale INT|Ale RT|Ale RH|Ale
NC_003076.8_12113704_12120134	NC_003076.8	12113704	12120134	6431	LTR	Nonautonomous:Copia	Bianca	GAG|Bianca PROT|Bianca INT|Bianca RT|Bianca RH|Bianca
NC_003076.8_12616218_12621580	NC_003076.8	12616218	12621580	5363	LTR	Nonautonomous:Copia	Ale	GAG|Ale PROT|Ale INT|Ale RT|Ale RH|Ale
NC_003076.8_14822456_14825836	NC_003076.8	14822456	14825836	3381	LTR	Nonautonomous:Copia	Ale	RH|Ale RT|Ale
NC_003076.8_15175728_15180948	NC_003076.8	15175728	15180948	5221	LTR	Nonautonomous:Copia	Tork	GAG|Tork PROT|Tork INT|Tork RT|Tork RH|Tork
NC_003076.8_15646197_15651170	NC_003076.8	15646197	15651170	4974	LTR	Nonautonomous:Copia	Ale	GAG|Ty1_copia PROT|Ale INT|Ale RT|Ale RH|Ale
NC_003076.8_17090770_17095674	NC_003076.8	17090770	17095674	4905	LTR	Nonautonomous:Copia	Ale	GAG|Ale PROT|Ale INT|Ale RT|Ale RH|Ale
NC_003076.8_17596764_17605846	NC_003076.8	17596764	17605846	9083	LTR	Nonautonomous:Copia	SIRE	GAG|SIRE PROT|SIRE INT|SIRE RT|SIRE RH|SIRE
NC_003076.8_18142156_18146897	NC_003076.8	18142156	18146897	4742	LTR	Nonautonomous:Copia	Ale	GAG|Ale PROT|Ale INT|Ale RT|Ale RH|Ale
NC_003076.8_18233631_18238198	NC_003076.8	18233631	18238198	4568	LTR	Nonautonomous:Copia	Ivana	GAG|Ivana PROT|Ivana INT|Ivana RT|Ivana RH|Ivana
NC_003076.8_18490608_18495233	NC_003076.8	18490608	18495233	4626	LTR	Nonautonomous:Copia	Ivana	GAG|Ivana PROT|Ivana INT|Ivana RT|Ivana RH|Ivana
NC_003076.8_22002017_22006884	NC_003076.8	22002017	22006884	4868	LTR	Nonautonomous:Copia	Ale	GAG|Ale PROT|Ale INT|Ale RT|Ale RH|Ale
NC_003076.8_22613355_22618266	NC_003076.8	22613355	22618266	4912	LTR	Nonautonomous:Copia	Ale	GAG|Ale PROT|Ale INT|Ale RT|Ale RH|Ale
NC_003076.8_22911048_22916161	NC_003076.8	22911048	22916161	5114	LTR	Nonautonomous:Copia	Bianca	RH|Bianca
NC_003076.8_2441254_2443637	NC_003076.8	2441254	2443637	2384	LTR	Nonautonomous:Copia	Ale	RT|Ale RH|Ale
NC_003076.8_26258300_26260067	NC_003076.8	26258300	26260067	1768	LTR	Nonautonomous:Copia	Ale	RT|Ale RH|Ale
NC_003076.8_4208083_4213084	NC_003076.8	4208083	4213084	5002	LTR	Nonautonomous:Copia	Ivana	GAG|Ivana PROT|Ivana INT|Ivana RT|Ivana RH|Ivana
NC_003076.8_64772_71199	NC_003076.8	64772	71199	6428	LTR	Nonautonomous:Copia	Bianca	GAG|Bianca PROT|Bianca INT|Bianca RT|Bianca RH|Bianca
NC_003076.8_8624509_8629381	NC_003076.8	8624509	8629381	4873	LTR	Nonautonomous:Copia	Ale	GAG|Ale PROT|Ale INT|Ale RT|Ale RH|Ale
NC_003076.8_8927997_8934328	NC_003076.8	8927997	8934328	6332	LTR	Nonautonomous:Copia	Bianca	GAG|Bianca PROT|Bianca INT|Bianca RT|Bianca RH|Bianca
NC_003076.8_9272140_9274532	NC_003076.8	9272140	9274532	2393	LTR	Nonautonomous:Copia	Ivana	GAG|Ivana PROT|Ivana RH|Ivana
NC_003076.8_9381704_9386621	NC_003076.8	9381704	9386621	4918	LTR	Nonautonomous:Copia	Bianca	RH|Bianca
NC_003070.9_13334466_13339870	NC_003070.9	13334466	13339870	5405	LTR	Nonautonomous:Gypsy	Reina	GAG|Reina PROT|Reina RT|Reina RH|Reina INT|Reina CHD|Reina
NC_003070.9_13507780_13515964	NC_003070.9	13507780	13515964	8185	LTR	Nonautonomous:Gypsy	Tekay	GAG|Tekay PROT|Tekay RT|Tekay RH|Tekay INT|Tekay CHD|Tekay
NC_003070.9_13659273_13667557	NC_003070.9	13659273	13667557	8285	LTR	Nonautonomous:Gypsy	Tekay	GAG|Tekay PROT|Tekay RT|Tekay RH|Tekay INT|Tekay CHD|Tekay
NC_003070.9_13818567_13823888	NC_003070.9	13818567	13823888	5322	LTR	Nonautonomous:Gypsy	Reina	GAG|Reina PROT|Reina RT|Reina RH|Reina INT|Reina CHD|Reina
NC_003070.9_13883073_13890962	NC_003070.9	13883073	13890962	7890	LTR	Nonautonomous:Gypsy	Tekay	GAG|Tekay PROT|Tekay RT|Tekay RH|Tekay INT|Tekay CHD|Tekay
NC_003070.9_14019278_14024518	NC_003070.9	14019278	14024518	5241	LTR	Nonautonomous:Gypsy	Reina	GAG|Reina PROT|Reina RT|Reina RH|Reina INT|Reina CHD|Reina
NC_003070.9_14214747_14225656	NC_003070.9	14214747	14225656	10910	LTR	Nonautonomous:Gypsy	Athila	GAG|Athila PROT|Athila
NC_003070.9_14365894_14380468	NC_003070.9	14365894	14380468	14575	LTR	Nonautonomous:Gypsy	Athila	PROT|Athila
NC_003070.9_14411547_14426121	NC_003070.9	14411547	14426121	14575	LTR	Nonautonomous:Gypsy	Athila	PROT|Athila
NC_003070.9_14432223_14442952	NC_003070.9	14432223	14442952	10730	LTR	Nonautonomous:Gypsy	Athila	GAG|Athila PROT|Athila
NC_003070.9_16626036_16637234	NC_003070.9	16626036	16637234	11199	LTR	Nonautonomous:Gypsy	Retand	GAG|Retand PROT|Retand RT|Retand RH|Retand INT|Retand
NC_003070.9_17255285_17265289	NC_003070.9	17255285	17265289	10005	LTR	Nonautonomous:Gypsy	Retand	GAG|Retand PROT|Retand RT|Retand aRH|Retand INT|Retand
NC_003071.7_16330_24007	NC_003071.7	16330	24007	7678	LTR	Nonautonomous:Gypsy	Tekay	GAG|Tekay PROT|Tekay RT|Tekay RH|Tekay INT|Tekay CHD|Tekay
NC_003071.7_2075308_2080607	NC_003071.7	2075308	2080607	5300	LTR	Nonautonomous:Gypsy	Reina	GAG|Reina PROT|Reina RT|Reina RH|Reina INT|Reina CHD|Reina
NC_003071.7_2793407_2799747	NC_003071.7	2793407	2799747	6341	LTR	Nonautonomous:Gypsy	CRM	GAG|CRM PROT|CRM RT|CRM RH|CRM INT|CRM CHDCR|CRM
NC_003071.7_3752539_3763187	NC_003071.7	3752539	3763187	10649	LTR	Nonautonomous:Gypsy	Retand	GAG|Retand PROT|Retand aRH|Retand INT|Retand
NC_003071.7_3873692_3888488	NC_003071.7	3873692	3888488	14797	LTR	Nonautonomous:Gypsy	Athila	GAG|Athila PROT|Athila RT|Athila RH|Athila INT|Athila
NC_003071.7_4186081_4194762	NC_003071.7	4186081	4194762	8682	LTR	Nonautonomous:Gypsy	Athila	GAG|Athila PROT|Athila
NC_003071.7_4197160_4211222	NC_003071.7	4197160	4211222	14063	LTR	Nonautonomous:Gypsy	Athila	GAG|Athila PROT|Athila RT|Athila RH|Athila INT|Athila
NC_003071.7_42164_49787	NC_003071.7	42164	49787	7624	LTR	Nonautonomous:Gypsy	Tekay	GAG|Tekay PROT|Tekay RT|Tekay RH|Tekay INT|Tekay CHD|Tekay
NC_003071.7_4236658_4244396	NC_003071.7	4236658	4244396	7739	LTR	Nonautonomous:Gypsy	Tekay	GAG|Tekay PROT|Tekay RT|Tekay RH|Tekay INT|Tekay CHD|Tekay
NC_003071.7_4709690_4716011	NC_003071.7	4709690	4716011	6322	LTR	Nonautonomous:Gypsy	Athila	GAG|Athila PROT|Athila
NC_003071.7_4799641_4802568	NC_003071.7	4799641	4802568	2928	LTR	Nonautonomous:Gypsy	Reina	GAG|Reina
NC_003071.7_5984986_5996552	NC_003071.7	5984986	5996552	11567	LTR	Nonautonomous:Gypsy	Athila	GAG|Athila PROT|Athila
NC_003071.7_6113207_6124745	NC_003071.7	6113207	6124745	11539	LTR	Nonautonomous:Gypsy	Retand	GAG|Retand PROT|Retand RT|Retand RH|Retand INT|Retand
NC_003074.8_11578845_11586481	NC_003074.8	11578845	11586481	7637	LTR	Nonautonomous:Gypsy	Reina	CHD|Reina INT|Reina RH|Reina RT|Reina PROT|Reina GAG|Reina
NC_003074.8_12211822_12225829	NC_003074.8	12211822	12225829	14008	LTR	Nonautonomous:Gypsy	Athila	GAG|Athila PROT|Athila RT|Athila RH|Athila INT|Athila
NC_003074.8_12243854_12255282	NC_003074.8	12243854	12255282	11429	LTR	Nonautonomous:Gypsy	Athila	GAG|Athila PROT|Athila
NC_003074.8_12478085_12486325	NC_003074.8	12478085	12486325	8241	LTR	Nonautonomous:Gypsy	Tekay	GAG|Tekay PROT|Tekay RT|Tekay RH|Tekay INT|Tekay CHD|Tekay
NC_003074.8_12549509_12555918	NC_003074.8	12549509	12555918	6410	LTR	Nonautonomous:Gypsy	CRM	CHDCR|CRM GAG|CRM PROT|CRM RT|CRM RH|CRM INT|CRM
NC_003074.8_12576780_12589320	NC_003074.8	12576780	12589320	12541	LTR	Nonautonomous:Gypsy	Reina	GAG|Reina PROT|Reina RT|Reina RH|Reina INT|Reina CHD|Reina
NC_003074.8_12580262_12586834	NC_003074.8	12580262	12586834	6573	LTR	Nonautonomous:Gypsy	Reina	GAG|Reina PROT|Reina RT|Reina RH|Reina INT|Reina CHD|Reina
NC_003074.8_12853595_12861862	NC_003074.8	12853595	12861862	8268	LTR	Nonautonomous:Gypsy	Tekay	GAG|Tekay PROT|Tekay RT|Tekay RH|Tekay INT|Tekay CHD|Tekay
NC_003074.8_13240356_13252197	NC_003074.8	13240356	13252197	11842	LTR	Nonautonomous:Gypsy	Retand	GAG|Retand PROT|Retand RT|Retand INT|Retand
NC_003074.8_13315373_13317269	NC_003074.8	13315373	13317269	1897	LTR	Nonautonomous:Gypsy	Retand	GAG|Retand
NC_003074.8_13429766_13436148	NC_003074.8	13429766	13436148	6383	LTR	Nonautonomous:Gypsy	CRM	GAG|CRM PROT|CRM RT|CRM RH|CRM INT|CRM CHDCR|CRM
NC_003074.8_13674752_13680457	NC_003074.8	13674752	13680457	5706	LTR	Nonautonomous:Gypsy	Reina	GAG|Reina PROT|Reina RT|Reina RH|Reina INT|Reina CHD|Reina
NC_003074.8_14073146_14081963	NC_003074.8	14073146	14081963	8818	LTR	Nonautonomous:Gypsy	Athila	GAG|Athila PROT|Athila
NC_003074.8_14729395_14734605	NC_003074.8	14729395	14734605	5211	LTR	Nonautonomous:Gypsy	CRM	GAG|CRM PROT|CRM RT|CRM RH|CRM INT|CRM
NC_003074.8_15711476_15722693	NC_003074.8	15711476	15722693	11218	LTR	Nonautonomous:Gypsy	Athila	GAG|Athila PROT|Athila
NC_003074.8_15848723_15853865	NC_003074.8	15848723	15853865	5143	LTR	Nonautonomous:Gypsy	Reina	GAG|Reina PROT|Reina RT|Reina RH|Reina INT|Reina CHD|Reina
NC_003074.8_3807306_3812643	NC_003074.8	3807306	3812643	5338	LTR	Nonautonomous:Gypsy	Reina	GAG|Reina PROT|Reina RT|Reina RH|Reina INT|Reina CHD|Reina
NC_003074.8_8537353_8543559	NC_003074.8	8537353	8543559	6207	LTR	Nonautonomous:Gypsy	CRM	GAG|CRM PROT|CRM RT|CRM RH|CRM CHDCR|CRM
NC_003075.7_11820160_11825725	NC_003075.7	11820160	11825725	5566	LTR	Nonautonomous:Gypsy	Reina	GAG|Reina PROT|Reina RT|Reina RH|Reina INT|Reina CHD|Reina
NC_003075.7_15559246_15562581	NC_003075.7	15559246	15562581	3336	LTR	Nonautonomous:Gypsy	Reina	GAG|Reina
NC_003075.7_1669366_1680247	NC_003075.7	1669366	1680247	10882	LTR	Nonautonomous:Gypsy	Retand	GAG|Retand PROT|Retand RT|Retand RH|Retand INT|Retand
NC_003075.7_1943797_1955321	NC_003075.7	1943797	1955321	11525	LTR	Nonautonomous:Gypsy	Retand	GAG|Retand PROT|Retand RT|Retand RH|Retand INT|Retand
NC_003075.7_2001189_2010967	NC_003075.7	2001189	2010967	9779	LTR	Nonautonomous:Gypsy	Retand	GAG|Retand PROT|Retand RT|Retand RH|Retand INT|Retand
NC_003075.7_2090158_2094315	NC_003075.7	2090158	2094315	4158	LTR	Nonautonomous:Gypsy	CRM	GAG|CRM CHDCR|CRM
NC_003075.7_3173302_3183106	NC_003075.7	3173302	3183106	9805	LTR	Nonautonomous:Gypsy	Athila	GAG|Athila PROT|Athila
NC_003075.7_3344833_3354744	NC_003075.7	3344833	3354744	9912	LTR	Nonautonomous:Gypsy	Athila	GAG|Athila PROT|Athila
NC_003075.7_3929252_3935831	NC_003075.7	3929252	3935831	6580	LTR	Nonautonomous:Gypsy	Athila	GAG|Athila PROT|Athila
NC_003075.7_3987766_3997961	NC_003075.7	3987766	3997961	10196	LTR	Nonautonomous:Gypsy	Athila	GAG|Athila PROT|Athila
NC_003075.7_4133384_4142040	NC_003075.7	4133384	4142040	8657	LTR	Nonautonomous:Gypsy	Athila	GAG|Athila PROT|Athila RT|Athila RH|Athila INT|Athila
NC_003075.7_4239123_4249773	NC_003075.7	4239123	4249773	10651	LTR	Nonautonomous:Gypsy	Athila	GAG|Athila PROT|Athila
NC_003075.7_4502301_4514086	NC_003075.7	4502301	4514086	11786	LTR	Nonautonomous:Gypsy	Retand	GAG|Retand PROT|Retand RT|Retand INT|Retand
NC_003075.7_4677142_4684195	NC_003075.7	4677142	4684195	7054	LTR	Nonautonomous:Gypsy	Tekay	GAG|Tekay PROT|Tekay RT|Tekay RH|Tekay INT|Tekay
NC_003075.7_5063538_5074228	NC_003075.7	5063538	5074228	10691	LTR	Nonautonomous:Gypsy	Retand	GAG|Retand RT|Retand RH|Retand INT|Retand
NC_003075.7_5127101_5135152	NC_003075.7	5127101	5135152	8052	LTR	Nonautonomous:Gypsy	Tekay	GAG|Tekay PROT|Tekay RT|Tekay RH|Tekay INT|Tekay CHD|Tekay
NC_003076.8_10308307_10314018	NC_003076.8	10308307	10314018	5712	LTR	Nonautonomous:Gypsy	Reina	GAG|Reina PROT|Reina RT|Reina RH|Reina INT|Reina CHD|Reina
NC_003076.8_10764243_10772498	NC_003076.8	10764243	10772498	8256	LTR	Nonautonomous:Gypsy	Tekay	GAG|Tekay PROT|Tekay RT|Tekay RH|Tekay INT|Tekay CHD|Tekay
NC_003076.8_11042770_11057642	NC_003076.8	11042770	11057642	14873	LTR	Nonautonomous:Gypsy	Retand	GAG|Retand PROT|Retand RT|Retand
NC_003076.8_11086024_11099205	NC_003076.8	11086024	11099205	13182	LTR	Nonautonomous:Gypsy	Retand	GAG|Retand PROT|Retand RT|Retand RH|Retand INT|Retand
NC_003076.8_11159506_11166120	NC_003076.8	11159506	11166120	6615	LTR	Nonautonomous:Gypsy	Athila	GAG|Athila PROT|Athila
NC_003076.8_11320516_11331861	NC_003076.8	11320516	11331861	11346	LTR	Nonautonomous:Gypsy	Athila	GAG|Athila PROT|Athila
NC_003076.8_11503489_11512862	NC_003076.8	11503489	11512862	9374	LTR	Nonautonomous:Gypsy	Retand	GAG|Retand PROT|Retand RT|Retand aRH|Retand INT|Retand
NC_003076.8_11527310_11538273	NC_003076.8	11527310	11538273	10964	LTR	Nonautonomous:Gypsy	Retand	GAG|Retand PROT|Retand RT|Retand RH|Retand INT|Retand
NC_003076.8_11686010_11697351	NC_003076.8	11686010	11697351	11342	LTR	Nonautonomous:Gypsy	Athila	GAG|Athila PROT|Athila
NC_003076.8_11810265_11821592	NC_003076.8	11810265	11821592	11328	LTR	Nonautonomous:Gypsy	Athila	GAG|Athila PROT|Athila
NC_003076.8_11903693_11915221	NC_003076.8	11903693	11915221	11529	LTR	Nonautonomous:Gypsy	Athila	GAG|Athila RT|Athila RH|Athila INT|Athila
NC_003076.8_12007211_12018604	NC_003076.8	12007211	12018604	11394	LTR	Nonautonomous:Gypsy	Athila	GAG|Athila PROT|Athila
NC_003076.8_12029290_12043305	NC_003076.8	12029290	12043305	14016	LTR	Nonautonomous:Gypsy	Athila	GAG|Athila PROT|Athila RT|Athila RH|Athila INT|Athila
NC_003076.8_12315873_12323073	NC_003076.8	12315873	12323073	7201	LTR	Nonautonomous:Gypsy	Athila	GAG|Athila PROT|Athila
NC_003076.8_12500668_12508918	NC_003076.8	12500668	12508918	8251	LTR	Nonautonomous:Gypsy	Tekay	GAG|Tekay PROT|Tekay RT|Tekay RH|Tekay INT|Tekay CHD|Tekay
NC_003076.8_12518417_12531276	NC_003076.8	12518417	12531276	12860	LTR	Nonautonomous:Gypsy	Athila	GAG|Athila PROT|Athila RT|Athila RH|Athila INT|Athila
NC_003076.8_12639602_12650823	NC_003076.8	12639602	12650823	11222	LTR	Nonautonomous:Gypsy	Athila	GAG|Athila PROT|Athila
NC_003076.8_13142244_13148925	NC_003076.8	13142244	13148925	6682	LTR	Nonautonomous:Gypsy	Athila	GAG|Athila PROT|Athila
NC_003076.8_13261021_13272510	NC_003076.8	13261021	13272510	11490	LTR	Nonautonomous:Gypsy	Athila	GAG|Athila PROT|Athila RT|Athila RH|Athila INT|Athila
NC_003076.8_15233371_15245268	NC_003076.8	15233371	15245268	11898	LTR	Nonautonomous:Gypsy	Retand	GAG|Retand PROT|Retand RT|Retand RH|Retand INT|Retand
NC_003076.8_9211109_9218667	NC_003076.8	9211109	9218667	7559	LTR	Nonautonomous:Gypsy	Athila	GAG|Athila PROT|Athila
NC_003070.9_17473527_17476671	NC_003070.9	17473527	17476671	3145	LTR	Nonautonomous:TR-GAG	Reina	GAG|Reina
NC_003071.7_31487_36441	NC_003071.7	31487	36441	4955	LTR	Nonautonomous:Unknown	unknown	none
NC_003074.8_13186250_13194564	NC_003074.8	13186250	13194564	8315	LTR	Nonautonomous:Unknown	unknown	none

## Sheet: EDTA (All  Intact LTR-RT)
Supplementary File 5
LTR-RT id	Pseudomolecules/scaffolds	LTR-RT start	LTR-RT end	LTR-RT length	Class	Superfamily
NC_003070.9:3780765..3785720	NC_003070.9	3780765	3785720	4955	LTR	Copia
NC_003070.9:7717356..7722547	NC_003070.9	7717356	7722547	5191	LTR	Copia
NC_003070.9:9476002..9480634	NC_003070.9	9476002	9480634	4632	LTR	Copia
NC_003070.9:10610329..10614183	NC_003070.9	10610329	10614183	3854	LTR	Copia
NC_003070.9:11148091..11152835	NC_003070.9	11148091	11152835	4744	LTR	Copia
NC_003070.9:11789452..11794077	NC_003070.9	11789452	11794077	4625	LTR	Copia
NC_003070.9:12406711..12410000	NC_003070.9	12406711	12410000	3289	LTR	Copia
NC_003070.9:12813589..12816476	NC_003070.9	12813589	12816476	2887	LTR	Copia
NC_003070.9:13019157..13023945	NC_003070.9	13019157	13023945	4788	LTR	Copia
NC_003070.9:13439445..13448523	NC_003070.9	13439445	13448523	9078	LTR	Copia
NC_003070.9:14129671..14134851	NC_003070.9	14129671	14134851	5180	LTR	Copia
NC_003070.9:16117829..16124076	NC_003070.9	16117829	16124076	6247	LTR	Copia
NC_003070.9:16551721..16557069	NC_003070.9	16551721	16557069	5348	LTR	Copia
NC_003070.9:16853318..16858040	NC_003070.9	16853318	16858040	4722	LTR	Copia
NC_003070.9:17023916..17029257	NC_003070.9	17023916	17029257	5341	LTR	Copia
NC_003070.9:17203926..17206318	NC_003070.9	17203926	17206318	2392	LTR	Copia
NC_003070.9:17443081..17446790	NC_003070.9	17443081	17446790	3709	LTR	Copia
NC_003070.9:17520597..17525126	NC_003070.9	17520597	17525126	4529	LTR	Copia
NC_003070.9:17676607..17681382	NC_003070.9	17676607	17681382	4775	LTR	Copia
NC_003070.9:18828527..18833280	NC_003070.9	18828527	18833280	4753	LTR	Copia
NC_003070.9:21244324..21249198	NC_003070.9	21244324	21249198	4874	LTR	Copia
NC_003070.9:21346162..21351041	NC_003070.9	21346162	21351041	4879	LTR	Copia
NC_003070.9:21524995..21529850	NC_003070.9	21524995	21529850	4855	LTR	Copia
NC_003070.9:22100644..22105329	NC_003070.9	22100644	22105329	4685	LTR	Copia
NC_003070.9:26366607..26371668	NC_003070.9	26366607	26371668	5061	LTR	Copia
NC_003071.7:926131..929956	NC_003071.7	926131	929956	3825	LTR	Copia
NC_003071.7:1388832..1393901	NC_003071.7	1388832	1393901	5069	LTR	Copia
NC_003071.7:1906864..1912112	NC_003071.7	1906864	1912112	5248	LTR	Copia
NC_003071.7:2902330..2907117	NC_003071.7	2902330	2907117	4787	LTR	Copia
NC_003071.7:3687124..3692178	NC_003071.7	3687124	3692178	5054	LTR	Copia
NC_003071.7:4061046..4065458	NC_003071.7	4061046	4065458	4412	LTR	Copia
NC_003071.7:4230743..4236512	NC_003071.7	4230743	4236512	5769	LTR	Copia
NC_003071.7:5062484..5067403	NC_003071.7	5062484	5067403	4919	LTR	Copia
NC_003071.7:5073847..5078418	NC_003071.7	5073847	5078418	4571	LTR	Copia
NC_003071.7:5394710..5399649	NC_003071.7	5394710	5399649	4939	LTR	Copia
NC_003071.7:5852422..5857428	NC_003071.7	5852422	5857428	5006	LTR	Copia
NC_003071.7:6422230..6427295	NC_003071.7	6422230	6427295	5065	LTR	Copia
NC_003071.7:6819006..6823730	NC_003071.7	6819006	6823730	4724	LTR	Copia
NC_003071.7:7448762..7454289	NC_003071.7	7448762	7454289	5527	LTR	Copia
NC_003071.7:7598600..7602611	NC_003071.7	7598600	7602611	4011	LTR	Copia
NC_003071.7:9121958..9125818	NC_003071.7	9121958	9125818	3860	LTR	Copia
NC_003071.7:9187492..9195279	NC_003071.7	9187492	9195279	7787	LTR	Copia
NC_003071.7:12539441..12541817	NC_003071.7	12539441	12541817	2376	LTR	Copia
NC_003074.8:9226633..9231377	NC_003074.8	9226633	9231377	4744	LTR	Copia
NC_003074.8:11016111..11020804	NC_003074.8	11016111	11020804	4693	LTR	Copia
NC_003074.8:11122707..11127674	NC_003074.8	11122707	11127674	4967	LTR	Copia
NC_003074.8:11335553..11341895	NC_003074.8	11335553	11341895	6342	LTR	Copia
NC_003074.8:11652697..11657743	NC_003074.8	11652697	11657743	5046	LTR	Copia
NC_003074.8:11664969..11669787	NC_003074.8	11664969	11669787	4818	LTR	Copia
NC_003074.8:11697283..11702262	NC_003074.8	11697283	11702262	4979	LTR	Copia
NC_003074.8:13369174..13374107	NC_003074.8	13369174	13374107	4933	LTR	Copia
NC_003074.8:13561769..13568405	NC_003074.8	13561769	13568405	6636	LTR	Copia
NC_003074.8:14616108..14623209	NC_003074.8	14616108	14623209	7101	LTR	Copia
NC_003074.8:14671141..14675856	NC_003074.8	14671141	14675856	4715	LTR	Copia
NC_003074.8:15377102..15382206	NC_003074.8	15377102	15382206	5104	LTR	Copia
NC_003074.8:15540532..15549243	NC_003074.8	15540532	15549243	8711	LTR	Copia
NC_003074.8:15591669..15600821	NC_003074.8	15591669	15600821	9152	LTR	Copia
NC_003074.8:15621873..15626854	NC_003074.8	15621873	15626854	4981	LTR	Copia
NC_003074.8:15768787..15773747	NC_003074.8	15768787	15773747	4960	LTR	Copia
NC_003074.8:16691859..16697596	NC_003074.8	16691859	16697596	5737	LTR	Copia
NC_003074.8:16809187..16814152	NC_003074.8	16809187	16814152	4965	LTR	Copia
NC_003074.8:16957465..16962731	NC_003074.8	16957465	16962731	5266	LTR	Copia
NC_003074.8:18791152..18796088	NC_003074.8	18791152	18796088	4936	LTR	Copia
NC_003074.8:22059535..22064329	NC_003074.8	22059535	22064329	4794	LTR	Copia
NC_003074.8:22232175..22236802	NC_003074.8	22232175	22236802	4627	LTR	Copia
NC_003074.8:22695566..22700521	NC_003074.8	22695566	22700521	4955	LTR	Copia
NC_003074.8:23100313..23104852	NC_003074.8	23100313	23104852	4539	LTR	Copia
NC_003075.7:1312401..1317218	NC_003075.7	1312401	1317218	4817	LTR	Copia
NC_003075.7:1565685..1567403	NC_003075.7	1565685	1567403	1718	LTR	Copia
NC_003075.7:1749270..1755807	NC_003075.7	1749270	1755807	6537	LTR	Copia
NC_003075.7:2188979..2194314	NC_003075.7	2188979	2194314	5335	LTR	Copia
NC_003075.7:2198165..2203993	NC_003075.7	2198165	2203993	5828	LTR	Copia
NC_003075.7:3907466..3915199	NC_003075.7	3907466	3915199	7733	LTR	Copia
NC_003075.7:5303774..5309049	NC_003075.7	5303774	5309049	5275	LTR	Copia
NC_003075.7:5822426..5827300	NC_003075.7	5822426	5827300	4874	LTR	Copia
NC_003075.7:5905482..5916987	NC_003075.7	5905482	5916987	11505	LTR	Copia
NC_003075.7:6467413..6473067	NC_003075.7	6467413	6473067	5654	LTR	Copia
NC_003075.7:6588726..6593808	NC_003075.7	6588726	6593808	5082	LTR	Copia
NC_003075.7:6723347..6728790	NC_003075.7	6723347	6728790	5443	LTR	Copia
NC_003075.7:6914662..6919598	NC_003075.7	6914662	6919598	4936	LTR	Copia
NC_003075.7:10992996..10998058	NC_003075.7	10992996	10998058	5062	LTR	Copia
NC_003075.7:11363556..11368653	NC_003075.7	11363556	11368653	5097	LTR	Copia
NC_003075.7:11676468..11681340	NC_003075.7	11676468	11681340	4872	LTR	Copia
NC_003075.7:13624548..13627187	NC_003075.7	13624548	13627187	2639	LTR	Copia
NC_003075.7:13624548..13631872	NC_003075.7	13624548	13631872	7324	LTR	Copia
NC_003075.7:14258825..14263830	NC_003075.7	14258825	14263830	5005	LTR	Copia
NC_003076.8:64772..71199	NC_003076.8	64772	71199	6427	LTR	Copia
NC_003076.8:2441254..2443637	NC_003076.8	2441254	2443637	2383	LTR	Copia
NC_003076.8:4208083..4213084	NC_003076.8	4208083	4213084	5001	LTR	Copia
NC_003076.8:8624509..8629381	NC_003076.8	8624509	8629381	4872	LTR	Copia
NC_003076.8:8927997..8934328	NC_003076.8	8927997	8934328	6331	LTR	Copia
NC_003076.8:9272140..9274532	NC_003076.8	9272140	9274532	2392	LTR	Copia
NC_003076.8:12113704..12120134	NC_003076.8	12113704	12120134	6430	LTR	Copia
NC_003076.8:12616218..12621580	NC_003076.8	12616218	12621580	5362	LTR	Copia
NC_003076.8:14822456..14825836	NC_003076.8	14822456	14825836	3380	LTR	Copia
NC_003076.8:15175728..15180948	NC_003076.8	15175728	15180948	5220	LTR	Copia
NC_003076.8:15646197..15651170	NC_003076.8	15646197	15651170	4973	LTR	Copia
NC_003076.8:17090770..17095674	NC_003076.8	17090770	17095674	4904	LTR	Copia
NC_003076.8:17596764..17605846	NC_003076.8	17596764	17605846	9082	LTR	Copia
NC_003076.8:18142156..18146897	NC_003076.8	18142156	18146897	4741	LTR	Copia
NC_003076.8:18233631..18238198	NC_003076.8	18233631	18238198	4567	LTR	Copia
NC_003076.8:18490608..18495233	NC_003076.8	18490608	18495233	4625	LTR	Copia
NC_003076.8:22002017..22006884	NC_003076.8	22002017	22006884	4867	LTR	Copia
NC_003076.8:22613355..22618266	NC_003076.8	22613355	22618266	4911	LTR	Copia
NC_003076.8:26258300..26260067	NC_003076.8	26258300	26260067	1767	LTR	Copia
NC_003070.9:13334466..13339870	NC_003070.9	13334466	13339870	5404	LTR	Gypsy
NC_003070.9:13507780..13515964	NC_003070.9	13507780	13515964	8184	LTR	Gypsy
NC_003070.9:13659273..13667557	NC_003070.9	13659273	13667557	8284	LTR	Gypsy
NC_003070.9:13818567..13823888	NC_003070.9	13818567	13823888	5321	LTR	Gypsy
NC_003070.9:13883073..13890962	NC_003070.9	13883073	13890962	7889	LTR	Gypsy
NC_003070.9:14019278..14024518	NC_003070.9	14019278	14024518	5240	LTR	Gypsy
NC_003070.9:14214747..14225656	NC_003070.9	14214747	14225656	10909	LTR	Gypsy
NC_003070.9:14432223..14442952	NC_003070.9	14432223	14442952	10729	LTR	Gypsy
NC_003070.9:15240543..15244711	NC_003070.9	15240543	15244711	4168	LTR	Gypsy
NC_003070.9:15337662..15341830	NC_003070.9	15337662	15341830	4168	LTR	Gypsy
NC_003070.9:16626036..16637234	NC_003070.9	16626036	16637234	11198	LTR	Gypsy
NC_003070.9:17255285..17265289	NC_003070.9	17255285	17265289	10004	LTR	Gypsy
NC_003070.9:17473527..17476671	NC_003070.9	17473527	17476671	3144	LTR	Gypsy
NC_003071.7:16330..24007	NC_003071.7	16330	24007	7677	LTR	Gypsy
NC_003071.7:42164..49787	NC_003071.7	42164	49787	7623	LTR	Gypsy
NC_003071.7:2075308..2080607	NC_003071.7	2075308	2080607	5299	LTR	Gypsy
NC_003071.7:2793407..2799747	NC_003071.7	2793407	2799747	6340	LTR	Gypsy
NC_003071.7:3752539..3763187	NC_003071.7	3752539	3763187	10648	LTR	Gypsy
NC_003071.7:3873692..3888488	NC_003071.7	3873692	3888488	14796	LTR	Gypsy
NC_003071.7:4186081..4194762	NC_003071.7	4186081	4194762	8681	LTR	Gypsy
NC_003071.7:4197160..4211222	NC_003071.7	4197160	4211222	14062	LTR	Gypsy
NC_003071.7:4236658..4244396	NC_003071.7	4236658	4244396	7738	LTR	Gypsy
NC_003071.7:4709690..4716011	NC_003071.7	4709690	4716011	6321	LTR	Gypsy
NC_003071.7:5984986..5996552	NC_003071.7	5984986	5996552	11566	LTR	Gypsy
NC_003071.7:6113207..6124745	NC_003071.7	6113207	6124745	11538	LTR	Gypsy
NC_003074.8:3807306..3812643	NC_003074.8	3807306	3812643	5337	LTR	Gypsy
NC_003074.8:8537353..8543559	NC_003074.8	8537353	8543559	6206	LTR	Gypsy
NC_003074.8:11578845..11586481	NC_003074.8	11578845	11586481	7636	LTR	Gypsy
NC_003074.8:12211822..12225829	NC_003074.8	12211822	12225829	14007	LTR	Gypsy
NC_003074.8:12243854..12255282	NC_003074.8	12243854	12255282	11428	LTR	Gypsy
NC_003074.8:12478085..12486325	NC_003074.8	12478085	12486325	8240	LTR	Gypsy
NC_003074.8:12549509..12555918	NC_003074.8	12549509	12555918	6409	LTR	Gypsy
NC_003074.8:12576780..12589320	NC_003074.8	12576780	12589320	12540	LTR	Gypsy
NC_003074.8:12580262..12586834	NC_003074.8	12580262	12586834	6572	LTR	Gypsy
NC_003074.8:12853595..12861862	NC_003074.8	12853595	12861862	8267	LTR	Gypsy
NC_003074.8:13240356..13252197	NC_003074.8	13240356	13252197	11841	LTR	Gypsy
NC_003074.8:13429766..13436148	NC_003074.8	13429766	13436148	6382	LTR	Gypsy
NC_003074.8:13674752..13680457	NC_003074.8	13674752	13680457	5705	LTR	Gypsy
NC_003074.8:14073146..14081963	NC_003074.8	14073146	14081963	8817	LTR	Gypsy
NC_003074.8:14729395..14734605	NC_003074.8	14729395	14734605	5210	LTR	Gypsy
NC_003074.8:15711476..15722693	NC_003074.8	15711476	15722693	11217	LTR	Gypsy
NC_003075.7:1669366..1680247	NC_003075.7	1669366	1680247	10881	LTR	Gypsy
NC_003075.7:1943797..1955321	NC_003075.7	1943797	1955321	11524	LTR	Gypsy
NC_003075.7:2001189..2010967	NC_003075.7	2001189	2010967	9778	LTR	Gypsy
NC_003075.7:2090158..2094315	NC_003075.7	2090158	2094315	4157	LTR	Gypsy
NC_003075.7:3173302..3183106	NC_003075.7	3173302	3183106	9804	LTR	Gypsy
NC_003075.7:3344833..3354744	NC_003075.7	3344833	3354744	9911	LTR	Gypsy
NC_003075.7:3929252..3935831	NC_003075.7	3929252	3935831	6579	LTR	Gypsy
NC_003075.7:3987766..3997961	NC_003075.7	3987766	3997961	10195	LTR	Gypsy
NC_003075.7:4133384..4142040	NC_003075.7	4133384	4142040	8656	LTR	Gypsy
NC_003075.7:4239123..4249773	NC_003075.7	4239123	4249773	10650	LTR	Gypsy
NC_003075.7:4502301..4514086	NC_003075.7	4502301	4514086	11785	LTR	Gypsy
NC_003075.7:4677142..4684195	NC_003075.7	4677142	4684195	7053	LTR	Gypsy
NC_003075.7:5063538..5074228	NC_003075.7	5063538	5074228	10690	LTR	Gypsy
NC_003075.7:5127101..5135152	NC_003075.7	5127101	5135152	8051	LTR	Gypsy
NC_003075.7:11820160..11825725	NC_003075.7	11820160	11825725	5565	LTR	Gypsy
NC_003075.7:15559246..15562581	NC_003075.7	15559246	15562581	3335	LTR	Gypsy
NC_003076.8:9211109..9218667	NC_003076.8	9211109	9218667	7558	LTR	Gypsy
NC_003076.8:10308307..10314018	NC_003076.8	10308307	10314018	5711	LTR	Gypsy
NC_003076.8:10764243..10772498	NC_003076.8	10764243	10772498	8255	LTR	Gypsy
NC_003076.8:11042770..11057642	NC_003076.8	11042770	11057642	14872	LTR	Gypsy
NC_003076.8:11086024..11099205	NC_003076.8	11086024	11099205	13181	LTR	Gypsy
NC_003076.8:11159506..11166120	NC_003076.8	11159506	11166120	6614	LTR	Gypsy
NC_003076.8:11320516..11331861	NC_003076.8	11320516	11331861	11345	LTR	Gypsy
NC_003076.8:11503489..11512862	NC_003076.8	11503489	11512862	9373	LTR	Gypsy
NC_003076.8:11527310..11538273	NC_003076.8	11527310	11538273	10963	LTR	Gypsy
NC_003076.8:11686010..11697351	NC_003076.8	11686010	11697351	11341	LTR	Gypsy
NC_003076.8:11810265..11821592	NC_003076.8	11810265	11821592	11327	LTR	Gypsy
NC_003076.8:11903693..11915221	NC_003076.8	11903693	11915221	11528	LTR	Gypsy
NC_003076.8:12007211..12018604	NC_003076.8	12007211	12018604	11393	LTR	Gypsy
NC_003076.8:12029290..12043305	NC_003076.8	12029290	12043305	14015	LTR	Gypsy
NC_003076.8:12518417..12531276	NC_003076.8	12518417	12531276	12859	LTR	Gypsy
NC_003076.8:12639602..12650823	NC_003076.8	12639602	12650823	11221	LTR	Gypsy
NC_003076.8:13142244..13148925	NC_003076.8	13142244	13148925	6681	LTR	Gypsy
NC_003076.8:13261021..13272510	NC_003076.8	13261021	13272510	11489	LTR	Gypsy
NC_003070.9:4406006..4411120	NC_003070.9	4406006	4411120	5114	NA	unknown
NC_003070.9:17528667..17536138	NC_003070.9	17528667	17536138	7471	NA	unknown
NC_003071.7:31487..36441	NC_003071.7	31487	36441	4954	NA	unknown
NC_003071.7:909733..914338	NC_003071.7	909733	914338	4605	NA	unknown
NC_003071.7:1395260..1399516	NC_003071.7	1395260	1399516	4256	NA	unknown
NC_003071.7:4221455..4227718	NC_003071.7	4221455	4227718	6263	NA	unknown
NC_003071.7:4799641..4802568	NC_003071.7	4799641	4802568	2927	NA	unknown
NC_003071.7:5491268..5496081	NC_003071.7	5491268	5496081	4813	NA	unknown
NC_003074.8:12913470..12917700	NC_003074.8	12913470	12917700	4230	NA	unknown
NC_003074.8:13186250..13194564	NC_003074.8	13186250	13194564	8314	NA	unknown
NC_003074.8:14067618..14072003	NC_003074.8	14067618	14072003	4385	NA	unknown
NC_003074.8:14776938..14780430	NC_003074.8	14776938	14780430	3492	NA	unknown
NC_003074.8:15814611..15818285	NC_003074.8	15814611	15818285	3674	NA	unknown
NC_003074.8:18734248..18739392	NC_003074.8	18734248	18739392	5144	NA	unknown
NC_003074.8:22237229..22242465	NC_003074.8	22237229	22242465	5236	NA	unknown
NC_003075.7:2730142..2733130	NC_003075.7	2730142	2733130	2988	NA	unknown
NC_003075.7:2989844..2994783	NC_003075.7	2989844	2994783	4939	NA	unknown
NC_003075.7:6992609..6994363	NC_003075.7	6992609	6994363	1754	NA	unknown
NC_003075.7:7359462..7364591	NC_003075.7	7359462	7364591	5129	NA	unknown
NC_003075.7:7816826..7821792	NC_003075.7	7816826	7821792	4966	NA	unknown
NC_003075.7:8620192..8623023	NC_003075.7	8620192	8623023	2831	NA	unknown
NC_003075.7:9908996..9914046	NC_003075.7	9908996	9914046	5050	NA	unknown
NC_003075.7:10899527..10904692	NC_003075.7	10899527	10904692	5165	NA	unknown
NC_003076.8:9381704..9386621	NC_003076.8	9381704	9386621	4917	NA	unknown
NC_003076.8:10400732..10405873	NC_003076.8	10400732	10405873	5141	NA	unknown
NC_003076.8:13536039..13543177	NC_003076.8	13536039	13543177	7138	NA	unknown
NC_003076.8:22911048..22916161	NC_003076.8	22911048	22916161	5113	NA	unknown

## Sheet: Shared intact LTR-RTs 
Supplementary File 5
LTR-RT id	Pseudomolecules/scaffolds	LTR-RT start	LTR-RT end	LTR-RT length
NC_003070.9_10610329_10614183	NC_003070.9	10610329	10614183	3855
NC_003070.9_11148091_11152835	NC_003070.9	11148091	11152835	4745
NC_003070.9_11789452_11794077	NC_003070.9	11789452	11794077	4626
NC_003070.9_12406711_12410000	NC_003070.9	12406711	12410000	3290
NC_003070.9_12813589_12816476	NC_003070.9	12813589	12816476	2888
NC_003070.9_13019157_13023945	NC_003070.9	13019157	13023945	4789
NC_003070.9_13334466_13339870	NC_003070.9	13334466	13339870	5405
NC_003070.9_13439445_13448523	NC_003070.9	13439445	13448523	9079
NC_003070.9_13507780_13515964	NC_003070.9	13507780	13515964	8185
NC_003070.9_13659273_13667557	NC_003070.9	13659273	13667557	8285
NC_003070.9_13818567_13823888	NC_003070.9	13818567	13823888	5322
NC_003070.9_13883073_13890962	NC_003070.9	13883073	13890962	7890
NC_003070.9_14019278_14024518	NC_003070.9	14019278	14024518	5241
NC_003070.9_14129671_14134851	NC_003070.9	14129671	14134851	5181
NC_003070.9_14214747_14225656	NC_003070.9	14214747	14225656	10910
NC_003070.9_14432223_14442952	NC_003070.9	14432223	14442952	10730
NC_003070.9_16117829_16124076	NC_003070.9	16117829	16124076	6248
NC_003070.9_16551721_16557069	NC_003070.9	16551721	16557069	5349
NC_003070.9_16626036_16637234	NC_003070.9	16626036	16637234	11199
NC_003070.9_16853318_16858040	NC_003070.9	16853318	16858040	4723
NC_003070.9_17023916_17029257	NC_003070.9	17023916	17029257	5342
NC_003070.9_17203926_17206318	NC_003070.9	17203926	17206318	2393
NC_003070.9_17255285_17265289	NC_003070.9	17255285	17265289	10005
NC_003070.9_17443081_17446790	NC_003070.9	17443081	17446790	3710
NC_003070.9_17473527_17476671	NC_003070.9	17473527	17476671	3145
NC_003070.9_17520597_17525126	NC_003070.9	17520597	17525126	4530
NC_003070.9_17676607_17681382	NC_003070.9	17676607	17681382	4776
NC_003070.9_18828527_18833280	NC_003070.9	18828527	18833280	4754
NC_003070.9_21244324_21249198	NC_003070.9	21244324	21249198	4875
NC_003070.9_21346162_21351041	NC_003070.9	21346162	21351041	4880
NC_003070.9_21524995_21529850	NC_003070.9	21524995	21529850	4856
NC_003070.9_22100644_22105329	NC_003070.9	22100644	22105329	4686
NC_003070.9_26366607_26371668	NC_003070.9	26366607	26371668	5062
NC_003070.9_3780765_3785720	NC_003070.9	3780765	3785720	4956
NC_003070.9_4406006_4411120	NC_003070.9	4406006	4411120	5115
NC_003070.9_7717356_7722547	NC_003070.9	7717356	7722547	5192
NC_003070.9_9476002_9480634	NC_003070.9	9476002	9480634	4633
NC_003071.7_12539441_12541817	NC_003071.7	12539441	12541817	2377
NC_003071.7_1388832_1393901	NC_003071.7	1388832	1393901	5070
NC_003071.7_1395260_1399516	NC_003071.7	1395260	1399516	4257
NC_003071.7_16330_24007	NC_003071.7	16330	24007	7678
NC_003071.7_1906864_1912112	NC_003071.7	1906864	1912112	5249
NC_003071.7_2075308_2080607	NC_003071.7	2075308	2080607	5300
NC_003071.7_2793407_2799747	NC_003071.7	2793407	2799747	6341
NC_003071.7_2902330_2907117	NC_003071.7	2902330	2907117	4788
NC_003071.7_31487_36441	NC_003071.7	31487	36441	4955
NC_003071.7_3687124_3692178	NC_003071.7	3687124	3692178	5055
NC_003071.7_3752539_3763187	NC_003071.7	3752539	3763187	10649
NC_003071.7_3873692_3888488	NC_003071.7	3873692	3888488	14797
NC_003071.7_4061046_4065458	NC_003071.7	4061046	4065458	4413
NC_003071.7_4186081_4194762	NC_003071.7	4186081	4194762	8682
NC_003071.7_4197160_4211222	NC_003071.7	4197160	4211222	14063
NC_003071.7_42164_49787	NC_003071.7	42164	49787	7624
NC_003071.7_4230743_4236512	NC_003071.7	4230743	4236512	5770
NC_003071.7_4236658_4244396	NC_003071.7	4236658	4244396	7739
NC_003071.7_4709690_4716011	NC_003071.7	4709690	4716011	6322
NC_003071.7_4799641_4802568	NC_003071.7	4799641	4802568	2928
NC_003071.7_5062484_5067403	NC_003071.7	5062484	5067403	4920
NC_003071.7_5073847_5078418	NC_003071.7	5073847	5078418	4572
NC_003071.7_5394710_5399649	NC_003071.7	5394710	5399649	4940
NC_003071.7_5852422_5857428	NC_003071.7	5852422	5857428	5007
NC_003071.7_5984986_5996552	NC_003071.7	5984986	5996552	11567
NC_003071.7_6113207_6124745	NC_003071.7	6113207	6124745	11539
NC_003071.7_6422230_6427295	NC_003071.7	6422230	6427295	5066
NC_003071.7_6819006_6823730	NC_003071.7	6819006	6823730	4725
NC_003071.7_7448762_7454289	NC_003071.7	7448762	7454289	5528
NC_003071.7_7598600_7602611	NC_003071.7	7598600	7602611	4012
NC_003071.7_909733_914338	NC_003071.7	909733	914338	4606
NC_003071.7_9121958_9125818	NC_003071.7	9121958	9125818	3861
NC_003071.7_9187492_9195279	NC_003071.7	9187492	9195279	7788
NC_003071.7_926131_929956	NC_003071.7	926131	929956	3826
NC_003074.8_11016111_11020804	NC_003074.8	11016111	11020804	4694
NC_003074.8_11122707_11127674	NC_003074.8	11122707	11127674	4968
NC_003074.8_11335553_11341895	NC_003074.8	11335553	11341895	6343
NC_003074.8_11578845_11586481	NC_003074.8	11578845	11586481	7637
NC_003074.8_11652697_11657743	NC_003074.8	11652697	11657743	5047
NC_003074.8_11664969_11669787	NC_003074.8	11664969	11669787	4819
NC_003074.8_11697283_11702262	NC_003074.8	11697283	11702262	4980
NC_003074.8_12211822_12225829	NC_003074.8	12211822	12225829	14008
NC_003074.8_12243854_12255282	NC_003074.8	12243854	12255282	11429
NC_003074.8_12478085_12486325	NC_003074.8	12478085	12486325	8241
NC_003074.8_12549509_12555918	NC_003074.8	12549509	12555918	6410
NC_003074.8_12576780_12589320	NC_003074.8	12576780	12589320	12541
NC_003074.8_12580262_12586834	NC_003074.8	12580262	12586834	6573
NC_003074.8_12853595_12861862	NC_003074.8	12853595	12861862	8268
NC_003074.8_13186250_13194564	NC_003074.8	13186250	13194564	8315
NC_003074.8_13240356_13252197	NC_003074.8	13240356	13252197	11842
NC_003074.8_13369174_13374107	NC_003074.8	13369174	13374107	4934
NC_003074.8_13429766_13436148	NC_003074.8	13429766	13436148	6383
NC_003074.8_13561769_13568405	NC_003074.8	13561769	13568405	6637
NC_003074.8_13674752_13680457	NC_003074.8	13674752	13680457	5706
NC_003074.8_14073146_14081963	NC_003074.8	14073146	14081963	8818
NC_003074.8_14616108_14623209	NC_003074.8	14616108	14623209	7102
NC_003074.8_14671141_14675856	NC_003074.8	14671141	14675856	4716
NC_003074.8_14729395_14734605	NC_003074.8	14729395	14734605	5211
NC_003074.8_15377102_15382206	NC_003074.8	15377102	15382206	5105
NC_003074.8_15540532_15549243	NC_003074.8	15540532	15549243	8712
NC_003074.8_15591669_15600821	NC_003074.8	15591669	15600821	9153
NC_003074.8_15621873_15626854	NC_003074.8	15621873	15626854	4982
NC_003074.8_15711476_15722693	NC_003074.8	15711476	15722693	11218
NC_003074.8_15768787_15773747	NC_003074.8	15768787	15773747	4961
NC_003074.8_15814611_15818285	NC_003074.8	15814611	15818285	3675
NC_003074.8_16691859_16697596	NC_003074.8	16691859	16697596	5738
NC_003074.8_16809187_16814152	NC_003074.8	16809187	16814152	4966
NC_003074.8_16957465_16962731	NC_003074.8	16957465	16962731	5267
NC_003074.8_18734248_18739392	NC_003074.8	18734248	18739392	5145
NC_003074.8_18791152_18796088	NC_003074.8	18791152	18796088	4937
NC_003074.8_22059535_22064329	NC_003074.8	22059535	22064329	4795
NC_003074.8_22232175_22236802	NC_003074.8	22232175	22236802	4628
NC_003074.8_22695566_22700521	NC_003074.8	22695566	22700521	4956
NC_003074.8_23100313_23104852	NC_003074.8	23100313	23104852	4540
NC_003074.8_3807306_3812643	NC_003074.8	3807306	3812643	5338
NC_003074.8_8537353_8543559	NC_003074.8	8537353	8543559	6207
NC_003074.8_9226633_9231377	NC_003074.8	9226633	9231377	4745
NC_003075.7_10899527_10904692	NC_003075.7	10899527	10904692	5166
NC_003075.7_10992996_10998058	NC_003075.7	10992996	10998058	5063
NC_003075.7_11363556_11368653	NC_003075.7	11363556	11368653	5098
NC_003075.7_11676468_11681340	NC_003075.7	11676468	11681340	4873
NC_003075.7_11820160_11825725	NC_003075.7	11820160	11825725	5566
NC_003075.7_1312401_1317218	NC_003075.7	1312401	1317218	4818
NC_003075.7_13624548_13627187	NC_003075.7	13624548	13627187	2640
NC_003075.7_13624548_13631872	NC_003075.7	13624548	13631872	7325
NC_003075.7_14258825_14263830	NC_003075.7	14258825	14263830	5006
NC_003075.7_15559246_15562581	NC_003075.7	15559246	15562581	3336
NC_003075.7_1565685_1567403	NC_003075.7	1565685	1567403	1719
NC_003075.7_1669366_1680247	NC_003075.7	1669366	1680247	10882
NC_003075.7_1749270_1755807	NC_003075.7	1749270	1755807	6538
NC_003075.7_1943797_1955321	NC_003075.7	1943797	1955321	11525
NC_003075.7_2001189_2010967	NC_003075.7	2001189	2010967	9779
NC_003075.7_2090158_2094315	NC_003075.7	2090158	2094315	4158
NC_003075.7_2188979_2194314	NC_003075.7	2188979	2194314	5336
NC_003075.7_2198165_2203993	NC_003075.7	2198165	2203993	5829
NC_003075.7_3173302_3183106	NC_003075.7	3173302	3183106	9805
NC_003075.7_3344833_3354744	NC_003075.7	3344833	3354744	9912
NC_003075.7_3907466_3915199	NC_003075.7	3907466	3915199	7734
NC_003075.7_3929252_3935831	NC_003075.7	3929252	3935831	6580
NC_003075.7_3987766_3997961	NC_003075.7	3987766	3997961	10196
NC_003075.7_4133384_4142040	NC_003075.7	4133384	4142040	8657
NC_003075.7_4239123_4249773	NC_003075.7	4239123	4249773	10651
NC_003075.7_4502301_4514086	NC_003075.7	4502301	4514086	11786
NC_003075.7_4677142_4684195	NC_003075.7	4677142	4684195	7054
NC_003075.7_5063538_5074228	NC_003075.7	5063538	5074228	10691
NC_003075.7_5127101_5135152	NC_003075.7	5127101	5135152	8052
NC_003075.7_5303774_5309049	NC_003075.7	5303774	5309049	5276
NC_003075.7_5822426_5827300	NC_003075.7	5822426	5827300	4875
NC_003075.7_5905482_5916987	NC_003075.7	5905482	5916987	11506
NC_003075.7_6467413_6473067	NC_003075.7	6467413	6473067	5655
NC_003075.7_6588726_6593808	NC_003075.7	6588726	6593808	5083
NC_003075.7_6723347_6728790	NC_003075.7	6723347	6728790	5444
NC_003075.7_6914662_6919598	NC_003075.7	6914662	6919598	4937
NC_003075.7_7359462_7364591	NC_003075.7	7359462	7364591	5130
NC_003075.7_7816826_7821792	NC_003075.7	7816826	7821792	4967
NC_003075.7_9908996_9914046	NC_003075.7	9908996	9914046	5051
NC_003076.8_10308307_10314018	NC_003076.8	10308307	10314018	5712
NC_003076.8_10400732_10405873	NC_003076.8	10400732	10405873	5142
NC_003076.8_10764243_10772498	NC_003076.8	10764243	10772498	8256
NC_003076.8_11042770_11057642	NC_003076.8	11042770	11057642	14873
NC_003076.8_11086024_11099205	NC_003076.8	11086024	11099205	13182
NC_003076.8_11159506_11166120	NC_003076.8	11159506	11166120	6615
NC_003076.8_11320516_11331861	NC_003076.8	11320516	11331861	11346
NC_003076.8_11503489_11512862	NC_003076.8	11503489	11512862	9374
NC_003076.8_11527310_11538273	NC_003076.8	11527310	11538273	10964
NC_003076.8_11686010_11697351	NC_003076.8	11686010	11697351	11342
NC_003076.8_11810265_11821592	NC_003076.8	11810265	11821592	11328
NC_003076.8_11903693_11915221	NC_003076.8	11903693	11915221	11529
NC_003076.8_12007211_12018604	NC_003076.8	12007211	12018604	11394
NC_003076.8_12029290_12043305	NC_003076.8	12029290	12043305	14016
NC_003076.8_12113704_12120134	NC_003076.8	12113704	12120134	6431
NC_003076.8_12518417_12531276	NC_003076.8	12518417	12531276	12860
NC_003076.8_12616218_12621580	NC_003076.8	12616218	12621580	5363
NC_003076.8_12639602_12650823	NC_003076.8	12639602	12650823	11222
NC_003076.8_13142244_13148925	NC_003076.8	13142244	13148925	6682
NC_003076.8_13261021_13272510	NC_003076.8	13261021	13272510	11490
NC_003076.8_14822456_14825836	NC_003076.8	14822456	14825836	3381
NC_003076.8_15175728_15180948	NC_003076.8	15175728	15180948	5221
NC_003076.8_15646197_15651170	NC_003076.8	15646197	15651170	4974
NC_003076.8_17090770_17095674	NC_003076.8	17090770	17095674	4905
NC_003076.8_17596764_17605846	NC_003076.8	17596764	17605846	9083
NC_003076.8_18142156_18146897	NC_003076.8	18142156	18146897	4742
NC_003076.8_18233631_18238198	NC_003076.8	18233631	18238198	4568
NC_003076.8_18490608_18495233	NC_003076.8	18490608	18495233	4626
NC_003076.8_22002017_22006884	NC_003076.8	22002017	22006884	4868
NC_003076.8_22613355_22618266	NC_003076.8	22613355	22618266	4912
NC_003076.8_22911048_22916161	NC_003076.8	22911048	22916161	5114
NC_003076.8_2441254_2443637	NC_003076.8	2441254	2443637	2384
NC_003076.8_26258300_26260067	NC_003076.8	26258300	26260067	1768
NC_003076.8_4208083_4213084	NC_003076.8	4208083	4213084	5002
NC_003076.8_64772_71199	NC_003076.8	64772	71199	6428
NC_003076.8_8624509_8629381	NC_003076.8	8624509	8629381	4873
NC_003076.8_8927997_8934328	NC_003076.8	8927997	8934328	6332
NC_003076.8_9211109_9218667	NC_003076.8	9211109	9218667	7559
NC_003076.8_9272140_9274532	NC_003076.8	9272140	9274532	2393
NC_003076.8_9381704_9386621	NC_003076.8	9381704	9386621	4918

## Sheet: MegaLTR unique intact LTR-RTs 
Supplementary File 5
LTR-RT id	Pseudomolecules/scaffolds	LTR-RT start	LTR-RT end	LTR-RT length	Class	Superfamily	Clade	Domains
NC_003070.9_14365894_14380468	NC_003070.9	14365894	14380468	14575	LTR	Nonautonomous:Gypsy	Athila	PROT|Athila
NC_003070.9_14411547_14426121	NC_003070.9	14411547	14426121	14575	LTR	Nonautonomous:Gypsy	Athila	PROT|Athila
NC_003074.8_10577158_10581824	NC_003074.8	10577158	10581824	4667	LTR	Nonautonomous:Copia	Ivana	GAG|Ivana PROT|Ivana INT|Ivana RT|Ivana RH|Ivana
NC_003074.8_13315373_13317269	NC_003074.8	13315373	13317269	1897	LTR	Nonautonomous:Gypsy	Retand	GAG|Retand
NC_003074.8_13360109_13368309	NC_003074.8	13360109	13368309	8201	LTR	Nonautonomous:Copia	SIRE	GAG|SIRE PROT|SIRE INT|SIRE RT|SIRE RH|SIRE
NC_003074.8_15848723_15853865	NC_003074.8	15848723	15853865	5143	LTR	Nonautonomous:Gypsy	Reina	GAG|Reina PROT|Reina RT|Reina RH|Reina INT|Reina CHD|Reina
NC_003076.8_10638497_10643362	NC_003076.8	10638497	10643362	4866	LTR	Nonautonomous:Copia	Ale	GAG|Ale PROT|Ale INT|Ale RT|Ale RH|Ale
NC_003076.8_12315873_12323073	NC_003076.8	12315873	12323073	7201	LTR	Nonautonomous:Gypsy	Athila	GAG|Athila PROT|Athila
NC_003076.8_12500668_12508918	NC_003076.8	12500668	12508918	8251	LTR	Nonautonomous:Gypsy	Tekay	GAG|Tekay PROT|Tekay RT|Tekay RH|Tekay INT|Tekay CHD|Tekay
NC_003076.8_15233371_15245268	NC_003076.8	15233371	15245268	11898	LTR	Nonautonomous:Gypsy	Retand	GAG|Retand PROT|Retand RT|Retand RH|Retand INT|Retand

## Sheet: EDTA unique intact LTR-RTs 
Supplementary File 5
LTR-RT id	Pseudomolecules/scaffolds	LTR-RT start	LTR-RT end	LTR-RT length	Class	Superfamily
NC_003070.9_15240543_15244711	NC_003070.9	15240543	15244711	4168	LTR	Gypsy
NC_003070.9_15337662_15341830	NC_003070.9	15337662	15341830	4168	LTR	Gypsy
NC_003070.9_17528667_17536138	NC_003070.9	17528667	17536138	7471	NA	unknown
NC_003071.7_4221455_4227718	NC_003071.7	4221455	4227718	6263	NA	unknown
NC_003071.7_5491268_5496081	NC_003071.7	5491268	5496081	4813	NA	unknown
NC_003074.8_12913470_12917700	NC_003074.8	12913470	12917700	4230	NA	unknown
NC_003074.8_14067618_14072003	NC_003074.8	14067618	14072003	4385	NA	unknown
NC_003074.8_14776938_14780430	NC_003074.8	14776938	14780430	3492	NA	unknown
NC_003074.8_22237229_22242465	NC_003074.8	22237229	22242465	5236	NA	unknown
NC_003075.7_2730142_2733130	NC_003075.7	2730142	2733130	2988	NA	unknown
NC_003075.7_2989844_2994783	NC_003075.7	2989844	2994783	4939	NA	unknown
NC_003075.7_6992609_6994363	NC_003075.7	6992609	6994363	1754	NA	unknown
NC_003075.7_8620192_8623023	NC_003075.7	8620192	8623023	2831	NA	unknown
NC_003076.8_13536039_13543177	NC_003076.8	13536039	13543177	7138	NA	unknown

## Sheet: EDTA unknown elements
Supplementary File 5
LTR-RT id	Pseudomolecules/scaffolds	LTR-RT start	LTR-RT end	LTR-RT length	Class	Superfamily
NC_003071.7:31487..36441	NC_003071.7	31487	36441	4954	NA	unknown
NC_003071.7:909733..914338	NC_003071.7	909733	914338	4605	NA	unknown
NC_003071.7:1395260..1399516	NC_003071.7	1395260	1399516	4256	NA	unknown
NC_003075.7:2730142..2733130	NC_003075.7	2730142	2733130	2988	NA	unknown
NC_003075.7:2989844..2994783	NC_003075.7	2989844	2994783	4939	NA	unknown
NC_003071.7:4221455..4227718	NC_003071.7	4221455	4227718	6263	NA	unknown
NC_003070.9:4406006..4411120	NC_003070.9	4406006	4411120	5114	NA	unknown
NC_003071.7:4799641..4802568	NC_003071.7	4799641	4802568	2927	NA	unknown
NC_003071.7:5491268..5496081	NC_003071.7	5491268	5496081	4813	NA	unknown
NC_003075.7:6992609..6994363	NC_003075.7	6992609	6994363	1754	NA	unknown
NC_003075.7:7359462..7364591	NC_003075.7	7359462	7364591	5129	NA	unknown
NC_003075.7:7816826..7821792	NC_003075.7	7816826	7821792	4966	NA	unknown
NC_003075.7:8620192..8623023	NC_003075.7	8620192	8623023	2831	NA	unknown
NC_003076.8:9381704..9386621	NC_003076.8	9381704	9386621	4917	NA	unknown
NC_003075.7:9908996..9914046	NC_003075.7	9908996	9914046	5050	NA	unknown
NC_003076.8:10400732..10405873	NC_003076.8	10400732	10405873	5141	NA	unknown
NC_003075.7:10899527..10904692	NC_003075.7	10899527	10904692	5165	NA	unknown
NC_003074.8:12913470..12917700	NC_003074.8	12913470	12917700	4230	NA	unknown
NC_003074.8:13186250..13194564	NC_003074.8	13186250	13194564	8314	NA	unknown
NC_003076.8:13536039..13543177	NC_003076.8	13536039	13543177	7138	NA	unknown
NC_003074.8:14067618..14072003	NC_003074.8	14067618	14072003	4385	NA	unknown
NC_003074.8:14776938..14780430	NC_003074.8	14776938	14780430	3492	NA	unknown
NC_003074.8:15814611..15818285	NC_003074.8	15814611	15818285	3674	NA	unknown
NC_003070.9:17528667..17536138	NC_003070.9	17528667	17536138	7471	NA	unknown
NC_003074.8:18734248..18739392	NC_003074.8	18734248	18739392	5144	NA	unknown
NC_003074.8:22237229..22242465	NC_003074.8	22237229	22242465	5236	NA	unknown
NC_003076.8:22911048..22916161	NC_003076.8	22911048	22916161	5113	NA	unknown

## Sheet: MegaLTR unknown elements
Supplementary File 5
LTR-RT id	Pseudomolecules/scaffolds	LTR-RT start	LTR-RT end	LTR-RT length	Class	Superfamily	Clade	Domains
NC_003071.7_31487_36441	NC_003071.7	31487	36441	4955	LTR	Nonautonomous:Unknown	unknown	none
NC_003074.8_13186250_13194564	NC_003074.8	13186250	13194564	8315	LTR	Nonautonomous:Unknown	unknown	none
