# Supplementary material for: MegaLTR: a web server and standalone pipeline for detecting and annotating LTR-retrotransposons in plant genomes
Source: Front Plant Sci. 2023 Sep 20;14:1237426. doi: 10.3389/fpls.2023.1237426 (PMC10552921; doi:10.3389/fpls.2023.1237426)
Supplement: Supplementary file 8 [file Table_1.xlsx]

## Sheet: Sheet1
Supplementary Table 1: The plant name, NCBI taxonomy ID, GenBank accession number, assembly level, LAI score, genome size, evolutionary rate, and number of pseudomolecules/scaffolds of the studied species
Species name	Taxonomy ID	GenBank assembly accession	Assembly level	Genome size	LAI value	Evolutionary rate	Number of pseudomolecules/scaffolds
Arabidopsis lyrata	81972	GCA_000004255.1	Scaffold	206.823	26.47	1.5e-08	696
Arabidopsis thaliana	3702	GCA_000001735.2	Chromosome	119.669	16.91	1.5e-08	7
Brassica rapa	3711	GCA_000309985.3	Chromosome	352.983	12.79	1.5e-08	1100
Citrus clementina	85681	GCA_000493195.1	Scaffold	301.365	20.21	1.5e-08	1398
Citrus unshiu	55188	GCA_002897195.1	Scaffold	359.652	8.77	1.5e-08	20876
Cucumis sativus	3659	GCA_000004075.3	Chromosome	226.641	9.3	1.5e-08	88
Glycine max	3847	GCA_000004515.4	Chromosome	978.942	9.5	1.5e-08	347
Medicago truncatula	3880	GCA_003473485.2	Chromosome	430.008	21.2	1.5e-08	42
Mikania micrantha	192012	GCA_009363875.1	Chromosome	1790.64	20.45	1.5e-08	2815
Oryza sativa Japonica	39947	GCA_001433935.1	Chromosome	374.423	22.41	1.3e-08	58
Panicum hallii	206008	GCA_002211085.2	Chromosome	535.889	21	1.3e-08	1027
Phoenix dactylifera	42345	GCA_009389715.1	Chromosome	773.189	22.15	1.5e-08	2391
Physcomitrella patens	3218	GCA_000002425.2	Chromosome	472.081	15.82	1.5e-08	359
Populus trichocarpa	3694	GCA_000002775.3	Chromosome	434.29	12.31	1.5e-08	1694
Prunus persica	3760	GCA_000346465.2	Chromosome	227.569	20.83	1.5e-08	192
Rosa chinensis	74649	GCA_002994745.2	Chromosome	515.119	21.69	1.5e-08	53
Salvia splendens	180675	GCA_004379255.2	Chromosome	806.486	20.78	1.5e-08	1178
Selaginella moellendorffii	88036	GCA_000143415.2	Scaffold	212.315	15.16	1.5e-08	757
Sesamum indicum	4182	GCA_000512975.1	Chromosome	275.059	12.12	1.5e-08	16369
Setaria viridis	4556	GCA_005286985.1	Chromosome	395.87	21.07	1.3e-08	76
Solanum lycopersicum	4081	GCA_000188115.3	Chromosome	828.349	9.64	1.5e-08	3150
Solanum pennellii	28526	GCA_001406875.2	Chromosome	926.426	8.85	1.5e-08	12
Sorghum bicolor	4558	GCA_000003195.3	Chromosome	709.345	25.59	1.3e-08	869
Trifolium pratense	57577	GCA_020283565.1	Chromosome	414.027	28.1	1.5e-08	90
Vitis vinifera	29760	GCA_000003745.2	Chromosome	486.197	14.32	1.5e-08	2061
Zea mays	4577	GCA_902167145.1	Chromosome	2182.79	29.45	1.3e-08	687
