# Supplementary material for: MegaLTR: a web server and standalone pipeline for detecting and annotating LTR-retrotransposons in plant genomes
Source: Front Plant Sci. 2023 Sep 20;14:1237426. doi: 10.3389/fpls.2023.1237426 (PMC10552921; doi:10.3389/fpls.2023.1237426)
Supplement: Supplementary file 9 [file Table_2.xlsx]

## Sheet: Sheet1
Supplementary Table 2: Liste of MegaLTR output files and tables
File description	File type
LTR-RTs that passed the filtering step	Table
Genes up- and down-stream of LTR-RT	Table
Non-TGCA LTR-RTs that passed filtering	Table
GFF3 format for intact LTR-RTs	GFF3
All LTRs recognized by RepeatMasker	Table
LTR-RTs density across chromosomes	PNG
Boxplot of LTR-RT insertion age	PNG
Distribution of LTR-RT insertion age	PNG
LTR family summary	Table
LTR-RTs sequences	Fasta
PBS sequences	FASTA
LTR-RTs that do not pass filtering	Table
PPT sequences	FASTA
Boxplot of LTR-RT length	PNG
Distribution of LTR-RT length	PNG
